# Supplementary material for: Impact of Prioritizing Elderly and High-risk Individuals During COVID-19 Vaccine Allocation
Source: Research Square preprint supplement (doi:10.21203/rs.3.rs-944201/v1), 2021-10-07
Supplement: Supplementary file 1 [file e485e5c6706604ac1970aa34.docx]

**Additional File 1:** Data sources, model description, model inputs; provides additional results for delayed vaccine distribution with prioritization.

**Impact of prioritizing elderly and high-risk individuals during COVID-19 vaccine allocation**

**Supplementary Section A: Data sources model description and model inputs**

**Intervention definitions**

The following baseline scenarios and pharmaceutical and non-pharmaceutical interventions are analyzed in our study:

- *School Closure (SC)* – no peer group interactions among children (i.e. no K-12 school interactions).
- *Voluntary Quarantine (VQ)* – All household members stay home if a household member experiences symptoms until the entire household is symptom-free.
- *Shelter-in-Place (SIP)* – Household members stay home complying with a state order.
- *Voluntary Shelter-in-Place (VSIP)* – Household members choose to follow SIP voluntarily.
- *Mask (M)* – An individual wears a mask while interacting with a peer group or community.
- *Vaccine (V)* –An individual gets vaccinated.

Household members complying with SIP VSIP or VQ do not engage in peer-group or community interactions. Compliance levels (<100%) under SIP VSIP and VQ probabilistically determine individual compliance and corresponding community interactions.

**Baseline Scenario Assumptions**

In the scenarios the following baseline conditions were considered. Shelter-in-place was in effect for four weeks (April 3-April 30) in Georgia [1] and compliance with shelter-in-place order was chosen to be 80%. Additionally after the end of SIP decreasing compliance with voluntary shelter-in-place was considered selected to be in line with social mobility indicators (60% after the SIP 40% 20% and 5% in the following weeks and 5% remains) [2]. Adherence to voluntary quarantine was changing weekly with the spread of the virus and protests (see *Supplementary Figure 1*). Wearing a mask in peer groups and communities was assumed to fluctuate weekly with the mask requirement in grocery stores and mask mandates in communities (see *Supplementary Figure 1*) [3, 4]. According to a recent analysis we assume masks reduce the infectivity to others and susceptibility of self by 50% each [5]. Because all K-12 schools in Georgia were closed starting 16 March 2020 until the end of July and most schools either teach hybrid or virtual in the fall scenarios assumed school closure [6]. Due to increased travel and family gatherings in the holiday season winter break and the spread of highly infectious strain in the US we assumed a transmission rate increased around thanksgiving and remained at that level (see *Supplementary Figure 1*). Weekly vaccine rollout in Georgia (from Georgia Department of Health vaccine dashboard regarding number of vaccines administered daily) versus the vaccination rollout speed assumption (1% 2% and 3% weekly) is depicted in *Supplementary Figure 2*.

**Supplementary Figure 1.** **Weekly Values of Voluntary Quarantine (VQ) and Masking (M) compliance and Transmission Rate (Beta).**


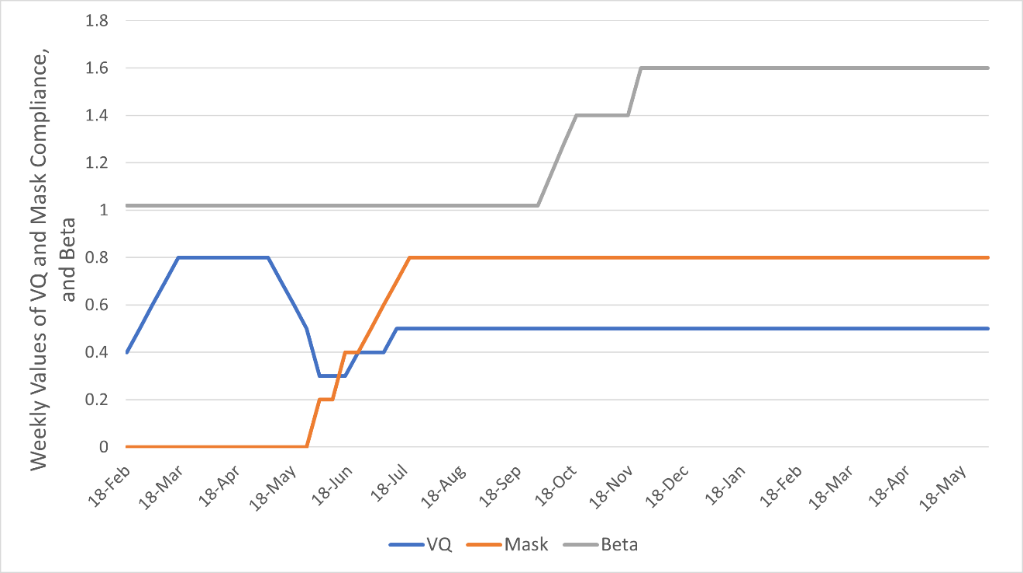


**Supplementary Figure 2. Weekly vaccine rollout.** Weekly vaccine rollout in Georgia(black) versus the vaccination rollout speed assumption (colored) (from Georgia Department of Health vaccine dashboard regarding number of vaccines administered daily)


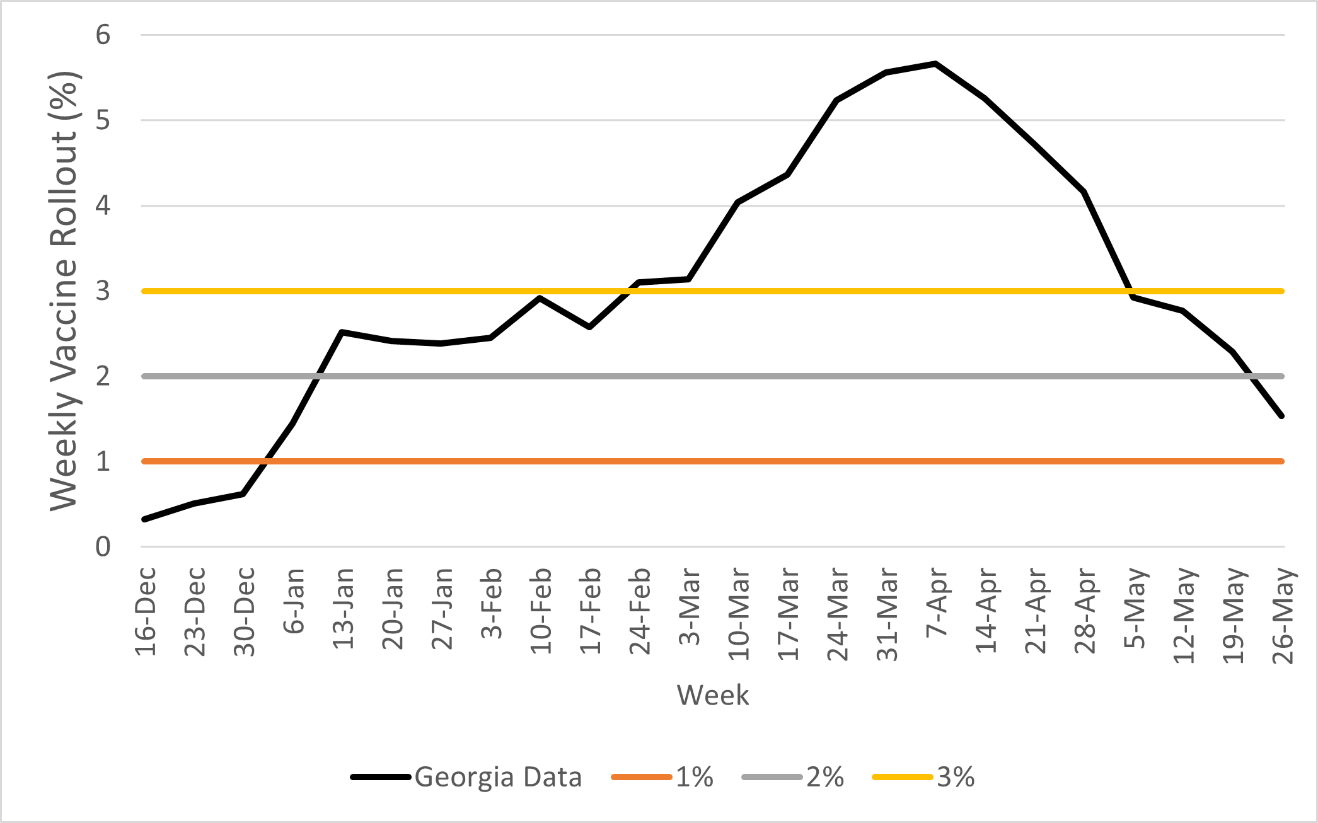


As an indicator for high-risk conditions we used the county-level age-stratified prevalence of diabetes heart disease chronic obstructive pulmonary disease (COPD) obesity and kidney disease [7]. While there are other conditions considered in this study affect many people and are observed to have a large impact on hospitalizations [8]. The probability of hospitalization is also specific to whether someone has diabetes or not matching both the relative risk and the overall hospitalization rate [9, 10]. Over the course of the COVID19 pandemic with the advancements in treatment the probability of death is changed. To reflect that improvement the probability of death is updated to 0.0388 for adults and 0.2881 for the elderly on 10 July 2020 and 0.0423 for adults and 0.2660 for the elderly on 10 September 2020 [11, 12] (see *Supplementary Table 1* for model parameters descriptions and references for the model input parameters).

If a person is susceptible at the time of vaccination depending on vaccine efficacy there is a 90% chance to transition to a Recovered state. On the contrary if a person is not susceptible the person experiences the natural course of the disease. Adults who are not hospitalized due to COVID19 are considered to be eligible for the vaccine.

**Supplementary Table 1. Model parameters descriptions and references for the model input parameters.**

| **Parameters** | **Estimates** | **References** |
| --- | --- | --- |
| Probability of Symptomatic | 0.63 | [13-16] |
| Probability of Hospitalization | 0.016 for age 0-19  0.18 for age 20-64  0.30 for age 65+ | [10] |
| Probability of Death  (from 18 February 2020) | 0 for age 0-19  0.103 for age 20-64  0.375 for age 65+ | [10, 16] |
| Probability of Death  (from 10 July 2020) | 0 for age 0-19  0.0388 for age 20-64  0.2881 for age 65+ | [11] |
| Probability of Death  (from 10 September 2020) | 0 for age 0-19  0.0423 for age 20-64  0.2660 for age 65+ | [12] |
| Reproductive Number ( ) | 2.4 | [17] |
| Transmission Rate (*β*) | 1.02 | [18] |
| Exposed Duration | Weibull with mean 4.6 days | [13] |
| Transition Duration | 0.5 days | [19] |
| Hospitalized Duration | Exponential with mean 7 days | [16, 19, 20] |
| Symptomatic Duration | Exponential with mean 2.9 days | [21] |
| Symptomatic-Asymptomatic Duration Ratio | 1.5 | | [19] | | --- | |
| Proportion of Transmission that Occurs at the Transition or Asymptomatic Stage (*θ*) | 0.48 | | [22] | | --- | |
| Proportion of Infections Generated by those who are Asymptomatic (*ω*) | 0.24 | [22] |

**Supplementary Section B: Results for Delayed Vaccine Distribution with Prioritization**

Results for an alternative scenario where the vaccination start date in two-staged and multi-staged prioritization was pushed a week later compared to no prioritization to illustrate potential delays due to following a prioritization schedule are provided in *Supplementary Table 2* and *Supplementary Table 3*.

**Supplementary Table 2: Outcome measures from the vaccination start date across scenarios with prioritization delay.**

|  |  |  | **Infections** | | |  | **Hospitalizations** | | |  | **Deaths** | | |
| --- | --- | --- | --- | --- | --- | --- | --- | --- | --- | --- | --- | --- | --- |
| **Vaccine Start** | **Group** | **Rollout Speed** | **A[[1]](#footnote-2)** | **B[[2]](#footnote-3)** | **C[[3]](#footnote-4)** |  | **A** | **B** | **C** |  | **A** | **B** | **C** |
| Dec 16th 2020  (Actual) | Overall | 1 | 1381272 | 1578268 | 1578313 |  | 33584 | 36508 | 36384 |  | 5994 | 5895 | 5906 |
| High-risk | 379888 | 423468 | 421826 |  | 24426 | 26257 | 26163 |  | 5206 | 5111 | 5142 |
| Non-high-risk | 1001385 | 1154800 | 1156487 |  | 9158 | 10250 | 10221 |  | 788 | 783 | 764 |
| Overall | 2 | 1139651 | 1418880 | 1418755 |  | 27731 | 32021 | 31944 |  | 5089 | 4925 | 4945 |
| High-risk | 308036 | 368719 | 362648 |  | 20287 | 22720 | 22456 |  | 4444 | 4265 | 4247 |
| Non-high-risk | 831615 | 1050161 | 1056106 |  | 7444 | 9302 | 9488 |  | 645 | 661 | 698 |
| Overall | 3 | 933536 | 1214285 | 1214320 |  | 23033 | 26865 | 26579 |  | 4295 | 4054 | 4000 |
| High-risk | 249065 | 309093 | 292775 |  | 16768 | 18927 | 18380 |  | 3757 | 3504 | 3419 |
| Non-high-risk | 684471 | 905191 | 921546 |  | 6265 | 7938 | 8198 |  | 538 | 550 | 580 |
| Sep 16th 2020  (**E**arly) | Overall | 1 | 1031390 | 1627525 | 1582510 |  | 23349 | 32242 | 30417 |  | 3960 | 3882 | 3640 |
| High-risk | 273167 | 402031 | 363509 |  | 16786 | 22241 | 20321 |  | 3429 | 3321 | 3063 |
| Non-high-risk | 758223 | 1225494 | 1219000 |  | 6563 | 10001 | 10096 |  | 531 | 561 | 577 |
| Overall | 2 | 498106 | 765098 | 754255 |  | 11551 | 15621 | 14135 |  | 2052 | 2080 | 1919 |
| High-risk | 129421 | 186102 | 151506 |  | 8334 | 10770 | 8979 |  | 1799 | 1793 | 1606 |
| Non-high-risk | 368684 | 578996 | 602749 |  | 3218 | 4851 | 5156 |  | 253 | 286 | 313 |
| Overall | 3 | 358185 | 510265 | 513315 |  | 8456 | 10740 | 10003 |  | 1586 | 1577 | 1452 |
| High-risk | 90662 | 123754 | 100605 |  | 6076 | 7493 | 6392 |  | 1369 | 1357 | 1197 |
| Non-high-risk | 267523 | 386511 | 412710 |  | 2380 | 3247 | 3612 |  | 217 | 221 | 254 |

Number of cumulative infections hospitalizations and deaths under different scenarios when the vaccination start date for schemes B and C are delayed one week.

**Supplementary Table 3: Difference and percentage change in outcome measures across scenarios with prioritization delay.**

|  |  |  | Difference (% change)[[4]](#footnote-6) | | |  | Difference (% change) | | |  | Difference (% change) | | |
| --- | --- | --- | --- | --- | --- | --- | --- | --- | --- | --- | --- | --- | --- |
| **Vaccine Start** | **Group** | **Rollout Speed** | **Infections** | **Hosp.** | **Deaths** |  | **Infections** | **Hosp.** | **Deaths** |  | **Infections** | **Hosp.** | **Deaths** |
| Dec 16th, 2020  (Actual) | Overall | 1 | 196996 (14.26) | 2924  (8.71) | -99  (-1.65) |  | 197041 (14.27) | 2800  (8.34) | -88  (-1.47) |  | 45  (0) | -124  (-0.34) | 11  (0.19) |
| High-risk | 43580 (11.47) | 1831  (7.5) | -95  (-1.81) |  | 41938 (11.04) | 1737  (7.11) | -64  (-1.22) |  | -1642  (-0.39) | -94  (-0.36) | 31  (0.6) |
| Non-high-risk | 153415 (15.32) | 1092  (11.92) | -5  (-0.59) |  | 155102 (15.49) | 1063 (11.61) | -24  (-3.09) |  | 1687  (0.15) | -29  (-0.28) | -19  (-2.51) |
| Overall | 2 | 279229 (24.5) | 4290  (15.47) | -164  (-3.22) |  | 279104 (24.49) | 4213 (15.19) | -144  (-2.82) |  | -125  (-0.01) | -77  (-0.24) | 20  (0.41) |
| High-risk | 60683  (19.7) | 2433  (11.99) | -179  (-4.04) |  | 54612 (17.73) | 2169 (10.69) | -197  (-4.43) |  | -6071  (-1.65) | -264  (-1.16) | -18  (-0.41) |
| Non-high-risk | 218546 (26.28) | 1858  (24.96) | 16  (2.48) |  | 224491 (26.99) | 2044 (27.46) | 53  (8.27) |  | 5945  (0.57) | 186  (2) | 37  (5.65) |
| Overall | 3 | 280749 (30.07) | 3832  (16.64) | -241  (-5.61) |  | 280784 (30.08) | 3546 (15.39) | -295  (-6.87) |  | 35  (0) | -286  (-1.07) | -54  (-1.33) |
| High-risk | 60028  (24.1) | 2159  (12.88) | -253  (-6.73) |  | 43710 (17.55) | 1612  (9.61) | -338  (-8.98) |  | -16318  (-5.28) | -547  (-2.89) | -85  (-2.42) |
| Non-high-risk | 220720 (32.25) | 1673  (26.7) | 12  (2.17) |  | 237075 (34.64) | 1933  (30.86) | 42  (7.87) |  | 16355 (1.81) | 260  (3.28) | 30  (5.58) |
| Sept. 16th, 2020  (**E**arly) | Overall | 1 | 596135 (57.8) | 8893  (38.09) | -78  (-1.97) |  | 551120 (53.43) | 7068 (30.27) | -320  (-8.08) |  | -45015  (-2.77) | -1825  (-5.66) | -242  (-6.23) |
| High-risk | 128864 (47.17) | 5455  (32.5) | -108  (-3.14) |  | 90342 (33.07) | 3535 (21.06) | -366  (-10.67) |  | -38522  (-9.58) | -1920  (-8.63) | -258  (-7.78) |
| Non-high-risk | 467271 (61.63) | 3438  (52.37) | 30  (5.58) |  | 460777 (60.77) | 3533 (53.82) | 46  (8.66) |  | -6494  (-0.53) | 95  (0.95) | 16  (2.91) |
| Overall | 2 | 266992 (53.6) | 4070  (35.23) | 28  (1.35) |  | 256149 (51.42) | 2584 (22.37) | -133  (-6.48) |  | -10843  (-1.42) | -1486  (-9.51) | -161  (-7.73) |
| High-risk | 56681  (43.8) | 2436  (29.23) | -6  (-0.32) |  | 22085 (17.06) | 645  (7.75) | -193  (-10.73) |  | -34596  (-18.59) | -1791  (-16.63) | -187  (-10.45) |
| Non-high-risk | 210312 (57.04) | 1633  (50.77) | 33  (13.18) |  | 234065 (63.49) | 1938 (60.24) | 60  (23.72) |  | 23753  (4.1) | 305  (6.28) | 27  (9.31) |
| Overall | 3 | 152080 (42.46) | 2284  (27.01) | -9  (-0.57) |  | 155130 (43.31) | 1547 (18.29) | -134  (-8.49) |  | 3050  (0.6) | -737  (-6.86) | -125  (-7.97) |
| High-risk | 33092  (36.5) | 1417  (23.32) | -12 (-0.9) |  | 9943 (10.97) | 316  (5.2) | -172  (-12.54) |  | -23149  (-18.71) | -1101  (-14.69) | -160  (-11.74) |
| Non-high-risk | 118988 (44.48) | 867  (36.42) | 4 (1.53) |  | 145187 (54.27) | 1232 (51.73) | 37  (17.02) |  | 26199 (6.78) | 365  (11.22) | 33  (15.26) |

Difference and percentage change in the number of cumulative infections hospitalizations and deaths between prioritization schemes A B and C[[5]](#footnote-7) when the vaccination start date for schemes B and C are delayed one week. The notation indicates the difference in the outcomes and percentage change from scheme X to scheme Y where a positive or negative number means an increase or decrease in the outcome measured from scheme X to scheme Y.

**REFERENCES**

1. **Executive Order to Ensure a Safe & Healthy Georgia** [<https://gov.georgia.gov/document/2020-executive-order/04022001/download>]

2. **Understand the impact of COVID-19 on traffic, travel patterns, toll revenues and more** [<https://www.streetlightdata.com/covid-transportation-metrics/>]

3. **Biggest Retail Chains Keeping Mask Mandates** [<https://www.aarp.org/health/healthy-living/info-2020/retailers-require-face-masks-coronavirus.html>]

4. **FULL LIST: What cities and counties are requiring face masks?** [<https://www.wsbtv.com/news/local/full-list-what-counties-cities-are-requiring-face-masks/VJQ3BQH2TBEMZICWXZQ5DIM5XE/>]

5. Fischer EP, Fischer MC, Grass D, Henrion I, Warren WS, Westman E: **Low-cost measurement of face mask efficacy for filtering expelled droplets during speech**. *Science Advances* 2020, **6**(36):eabd3083.

6. **COUNTY-BY-COUNTY: Plans for returning to school this fall** [<https://www.wsbtv.com/news/local/county-by-county-plans-returning-school-this-fall/QJAYLUB4TFBPBCJCIMVZXUQGFY/>]

7. U.S. Census Bureau: **American Community Survey, 2018 American Community Survey 1-year Estimates**. In*.*: U.S. Census Bureau; 2018.

8. **People with Certain Medical Conditions** [<https://www.cdc.gov/coronavirus/2019-ncov/need-extra-precautions/people-with-medical-conditions.html>]

9. **Pandemic Planning Scenarios** [<https://www.cdc.gov/coronavirus/2019-ncov/hcp/planning-scenarios.html>]

10. CDC COVID-19 Response Team: **Severe Outcomes Among Patients with Coronavirus Disease 2019 (COVID-19) — United States, February 12–March 16, 2020**. In*.*, vol. 69. Morbidity and Mortality Weekly Report (MMWR): CDC; 2020.

11. **Pandemic Planning Scenarios** [<https://www.cdc.gov/coronavirus/2019-ncov/hcp/planning-scenarios.html>]

12. **Pandemic Planning Scenarios** [<https://www.cdc.gov/coronavirus/2019-ncov/hcp/planning-scenarios.html>]

13. Mizumoto K, Kagaya K, Zarebski A, Chowell G: **Estimating the asymptomatic proportion of coronavirus disease 2019 (COVID-19) cases on board the Diamond Princess cruise ship, Yokohama, Japan, 2020**. *Eurosurveillance* 2020, **25**(10):2000180.

14. **Infected but Feeling Fine: The Unwitting Coronavirus Spreaders**

15. Nishiura H, Kobayashi T, Suzuki A, Jung SM, Hayashi K, Kinoshita R, Yang Y, Yuan B, Akhmetzhanov AR, Linton NM *et al*: **Estimation of the asymptomatic ratio of novel coronavirus infections (COVID-19)**. *International Journal of Infectious Diseases* 2020.

16. **COVID-19 Pandemic Planning Scenarios** [<https://www.cdc.gov/coronavirus/2019-ncov/hcp/planning-scenarios.html>]

17. WHO: **Report of the WHO-China Joint Mission on Coronavirus Disease 2019 (COVID-19)** In*.*: World Health Organization; 2020.

18. Li R, Pei S, Chen B, Song Y, Zhang T, Yang W, Shaman J: **Substantial undocumented infection facilitates the rapid dissemination of novel coronavirus (SARS-CoV2)**. *Science* 2020:eabb3221.

19. Ferguson NM, Laydon D, Nedjati-Gilani G, Imai N, Ainslie K, Baguelin M, Bhatia S, Boonyasiri A, Cucunubá Z, Cuomo-Dannenburg G *et al*: **Impact of non-pharmaceutical interventions (NPIs) to reduce COVID19 mortality and healthcare demand**. In*.*: Imperial College London; 2020.

20. Weitz J: **Intervention Serology and Interaction Substitution: Exploring the Role of `Immune Shielding' in Reducing COVID-19 Epidemic Spread** In*.*; 2020.

21. Riou J, Hauser A, Counotte MJ, Althaus CL: **Adjusted age-specific case fatality ratio during the COVID-19 epidemic in Hubei, China, January and February 2020**. *medRxiv* 2020:2020.2003.2004.20031104.

22. Ganyani T, Kremer C, Chen D, Torneri A, Faes C, Wallinga J, Hens N: **Estimating the generation interval for COVID-19 based on symptom onset data**. *medRxiv* 2020:2020.2003.2005.20031815.

1. (A) No prioritization: all people of age ≥20 are eligible (i.e., no prioritization) [↑](#footnote-ref-2)
2. (B) Two-staged prioritization: all people of age ≥65 are eligible, then all people of age ≥20 (only elderly is prioritized) [↑](#footnote-ref-3)
3. (C) Multi-staged prioritization: all people of age ≥65 are eligible, then high-risk people of age ≥20, then remaining people age ≥20 [↑](#footnote-ref-4)
4. (((Y-X)/X)*100) [↑](#footnote-ref-6)
5. (A) No prioritization: all people of age ≥20 are eligible (i.e., no prioritization); (B) Two-staged prioritization: all people of age ≥65 are eligible, then all people of age ≥20 (only elderly is prioritized); (C) Multi-staged prioritization: all people of age ≥65 are eligible, then high-risk people of age ≥20, then remaining people age ≥20 [↑](#footnote-ref-7)
